# Supplementary material for: An Episomal CRISPR/Cas12a System for Mediating Efficient Gene Editing
Source: MDPI journal article supplement (doi:10.3390/life11111262), 2021-11-18
Supplement: s1 [file s1]

# An Episomal CRISPR/Cpf1 System Mediated Efficient Gene Editing

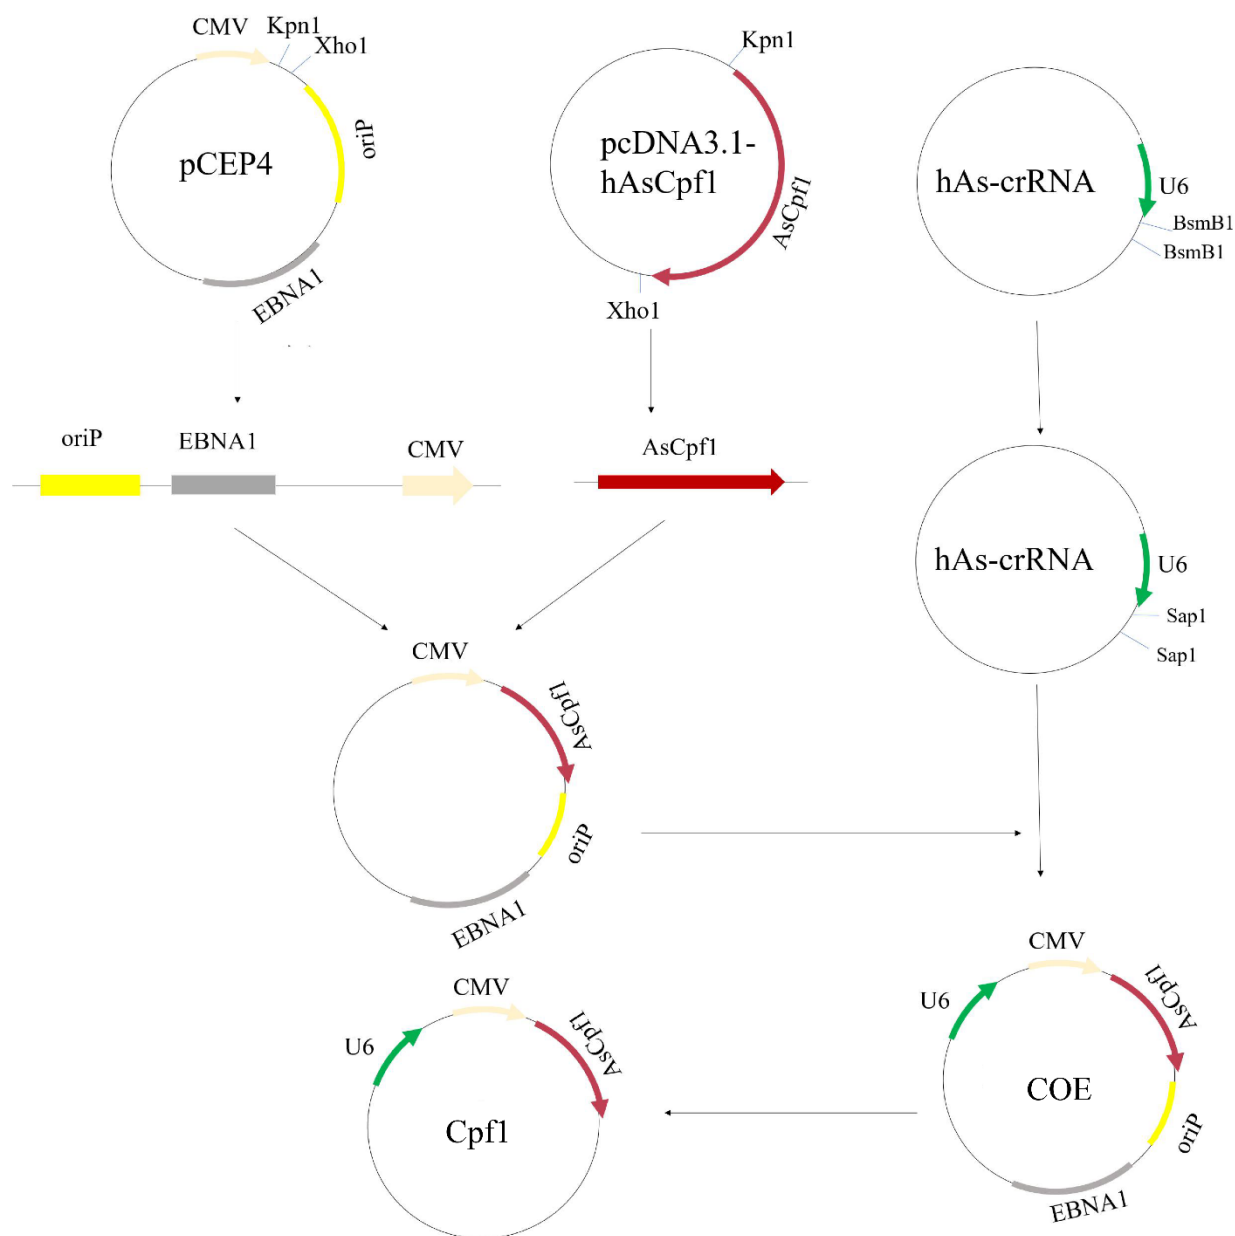

**Figure S1.** Schematic diagram of design and construction of episomal CRISPR/Cas12a.

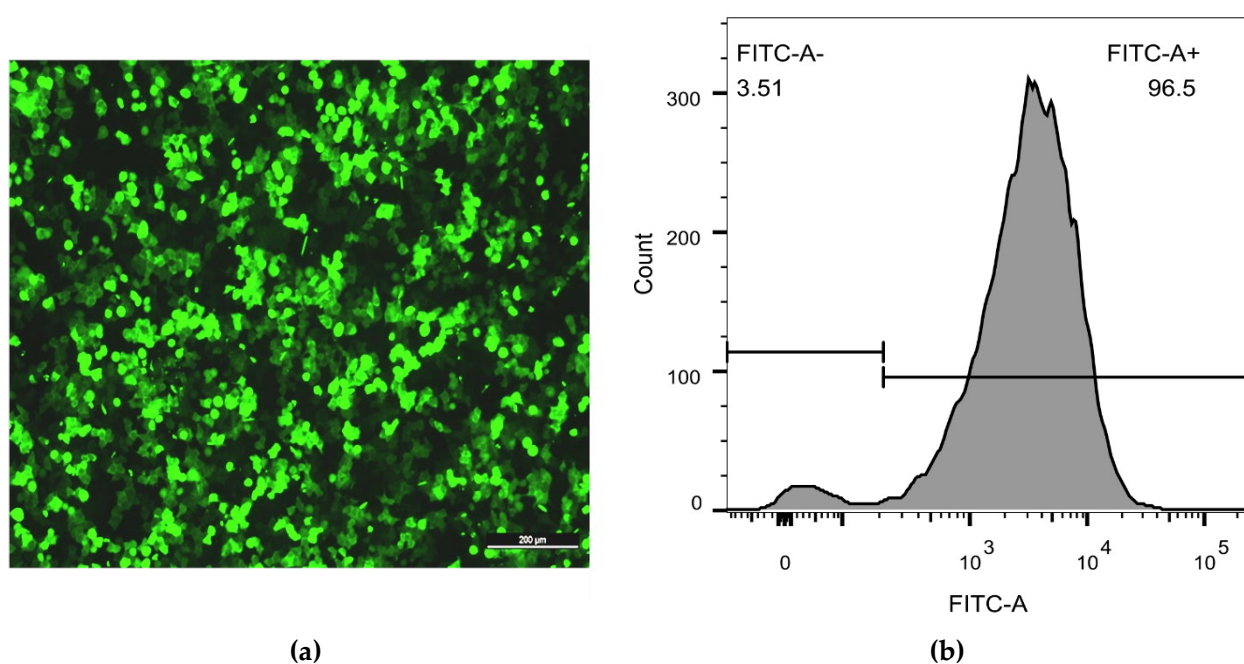

**Figure S2.** Stable GFP-expressing HEK-293T cell. (a) Image of fluorescence signal of HEK-293T stably expressing GFP. Scale bar: 500  $\mu\text{m}$ . (b) Flow results show that the rate of GFP positive cells was 96.5%.

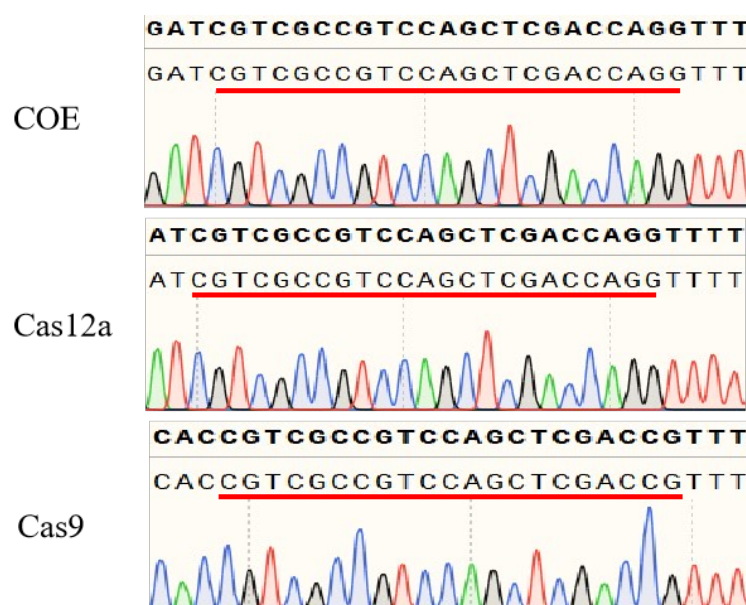

**Figure S3.** Vectors targeting GFP were sequenced by Sanger sequencing. Sanger sequencing results showed that vectors targeting GFP was successfully construct.

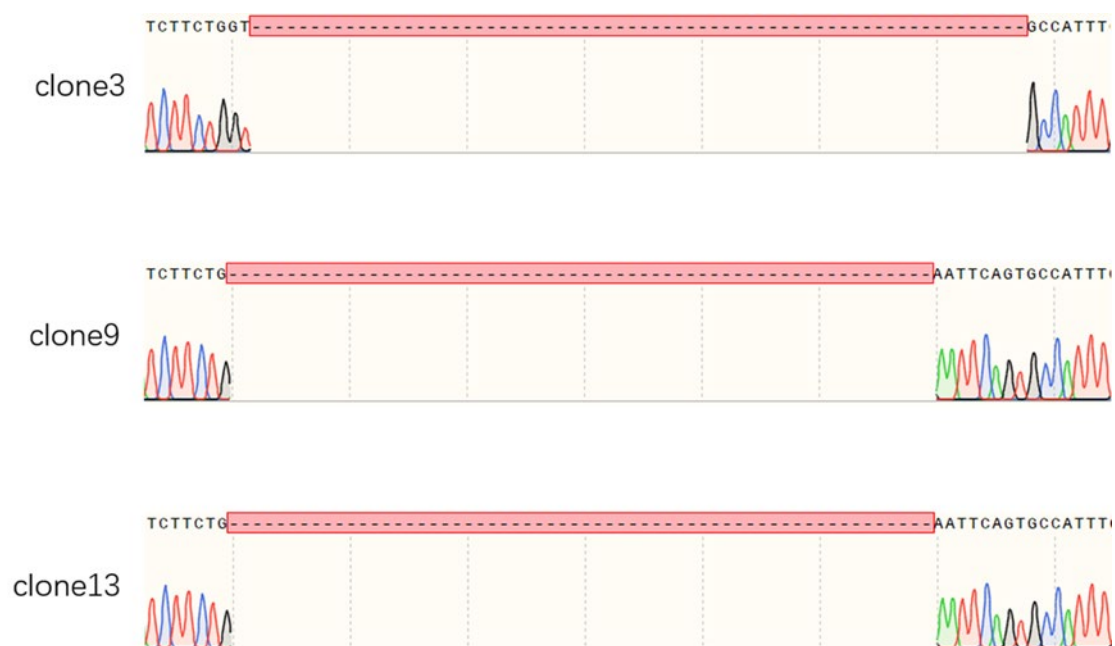

**Figure S4.** Sanger sequencing results of positive clones. Sanger sequencing results showed that Exon 51 was successfully deleted from three positive clones.

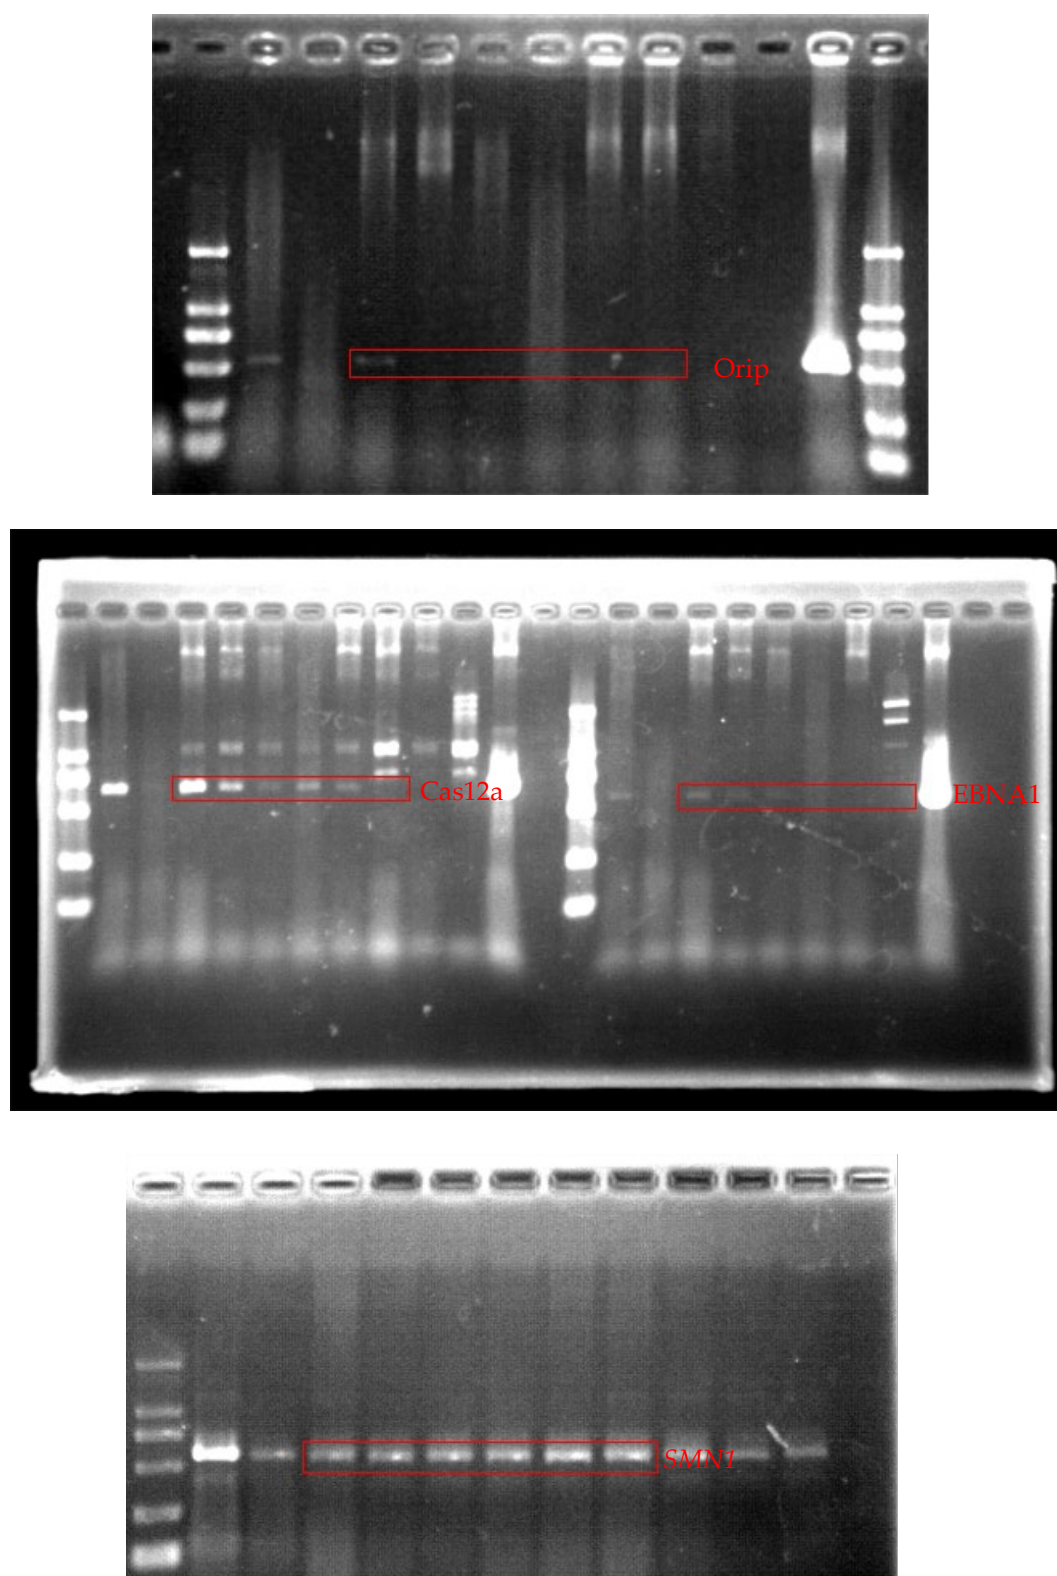

**Figure S5.** Agarose gel electrophoresis diagram showing all bands and molecular weight markers of Figure 3d.

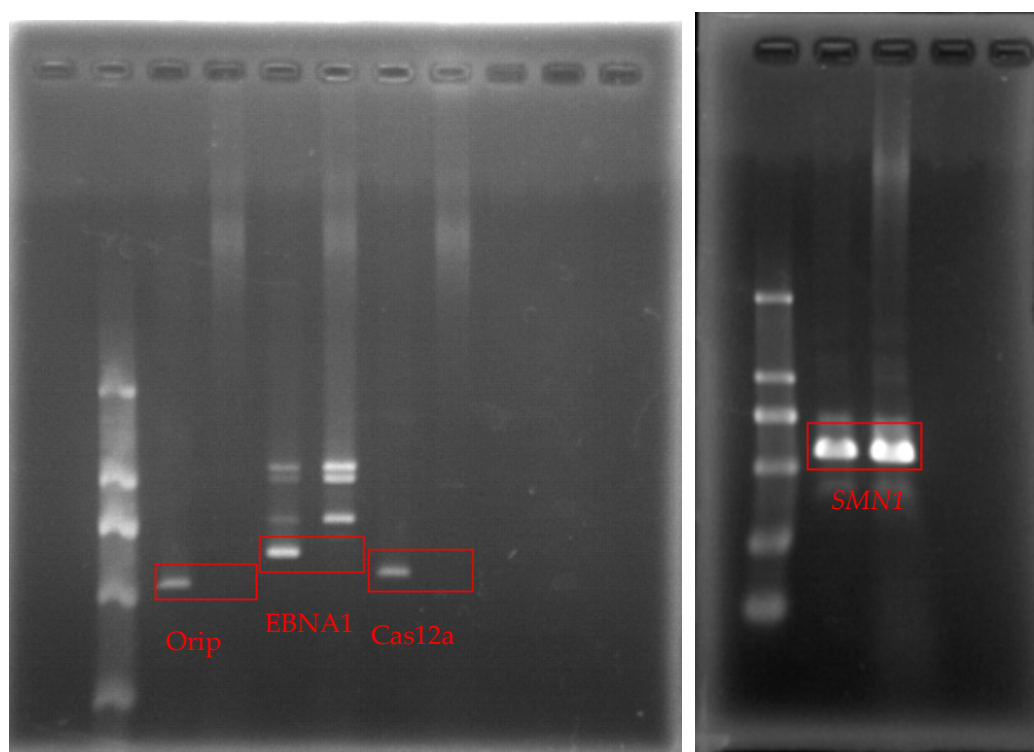

**Figure S6.** Agarose gel electrophoresis diagram showing all bands and molecular weight markers of Figure 3e.

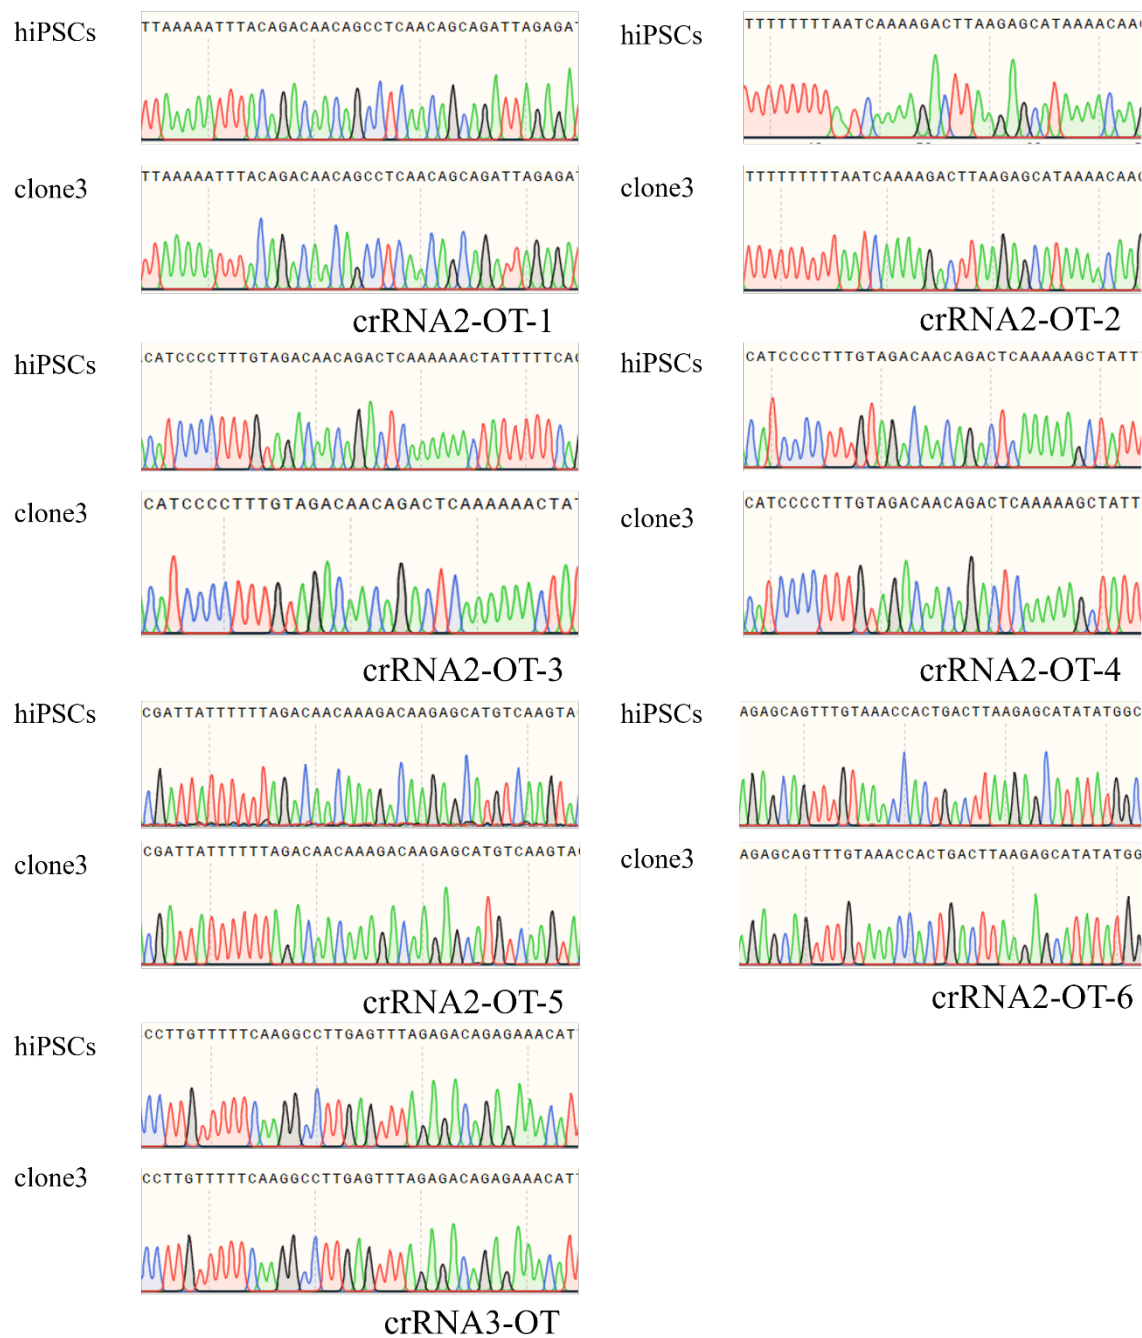

**Figure S7.** Sequencing results of off-target sites. Indels were detected by Sanger sequencing on seven predicted off-target sites in the positive clones. No indels was found in these sites.



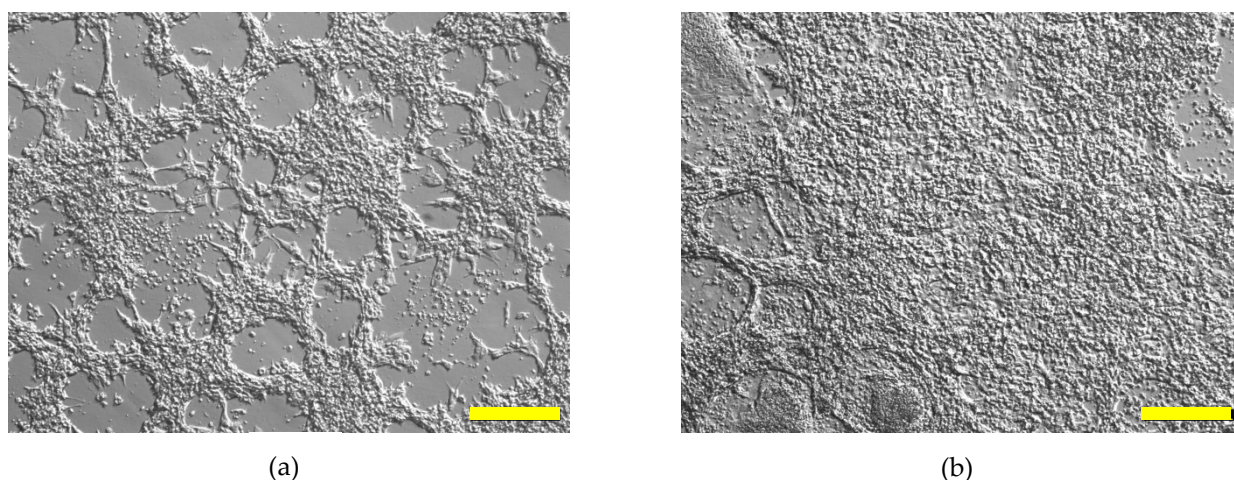

(a)

(b)

**Figure S8.** The morphology of cardiomyocytes. **(a)** The morphology of cardiomyocytes derived from hiPSCs at the day 18. **(b)** The morphology of cardiomyocytes derived from DMD-iPSCs at the day 18. Scale bar: 250  $\mu$ m.

**Table S1.** All the primers used in the study are showing in the Table.

| Name      | Sequence                                                                                      |
|-----------|-----------------------------------------------------------------------------------------------|
| Sap1      | F: AGATGGAAGAGCGAGACGGGATCCCGTCTCGCTCTTCC<br>R: AAAAGGAAGAGCGAGACGGGATCCCGTCTCGCTCTTCC        |
| U6        | F: TCTATATCATAATATGAGGGCTATTTCCCATGATTCCT<br>R: TGAGCCAATATAAATGTACaGCCGCAATTCACTAGTGATCAATTG |
| GFP-crRNA | F: GATCGTCGCCGTCAGCTCGACCAGG<br>R: AAACCTGGTCGAGCTGGACGGCGACG                                 |
| NRL-crRNA | F: GATCCAAGGAAGTGCAGGCTGCAGGG<br>R: AAACCCTGCAGCCTGCACTTCCTTGG                                |
| HBB-crRNA | F: GATTGATAGGCAGCCTGCACTGGTGG<br>R: AAACCACCACTGCAGGCTGCCTATCA                                |
| NRL       | F: TTTGCAGACCTTCGCTAGTC<br>R: CAGCAGACCGCTACATAATC                                            |
| HBB       | F: ATTGACCAAATCAGGTAATTTTGC<br>R: CCAGTTTAGTAGTTGGACTTAGGG                                    |
| crRNA2    | F: GATTAGACAACAGACTCAAGAGCATA<br>R: AAAATATGCTCTTGAGTCTGTTGTCTA                               |
| crRNA3    | F: GATAAGGCCCTTGAGCTTGAATACAGA<br>R: AAATCTGTATTCAAGCTCAAGGCCTT                               |
| chr2      | F: AGTGTCACTCACTTCTGGAACAT<br>R: CTACGGGTGAAAGTTGCTACG                                        |
| chr3      | F: GGACCCACCAATGAAAGCTG<br>R: AACCTAAGCAACACTTCCTT                                            |
| chr5-1    | F: CAAGCAGAGCCTTTCGGATG<br>R: GTAACACTACAAGGAACCGTCCTG                                        |
| chr5-2    | F: GTGCAGGCAGAGGAAAGTGGTAA<br>R: AGCCTCTAACACATTGCTTGGTTT                                     |
| chr5-3    | F: TGCTCCATTCTCAGCCTTGA<br>R: TTTGCCCAGCTGTAGAGGC                                             |
| chr7      | F: TAGCCCAACACAGGGTCTAAG<br>R: CTTTCTTGAGCACTTACATTTGG                                        |
| g3-chr2   | F: GCCCTCTGGAGCCTGATTAC<br>R: ACTGCCATGGGATGTAGGC                                             |
| OriP      | F: TTCCACGAGGGTAGTGAACC<br>R: TCGGGGTGTTAGAGACAAC                                             |
| EBNA-1    | F: ATCGTCAAAGCTGCACACAG<br>R: CCCAGGAGTCCCAGTAGTCA                                            |
| Cpf1      | F: TGAGACAGCCACATCATCGC<br>R: ACCAGTCCAGCAGGTGGTACA                                           |
| Del-51    | F: TCTTAGAATCGTTCACTGGTTGTCC<br>R: TGAATCCTTGTCTGCTACTTACTGG                                  |
| RT-51     | F: AGCAGTTCAAGCTAAACAACCGG<br>R: CCTAAGACCTGCTCAGCTTCTTC                                      |
